**Supplemental material Fig. 1. AIMP1 had no effect on SREBP1c or ERR $\gamma$  transcriptional activity.**

**A.** HEK293 cells were transfected with the indicated plasmids, viz., SREBP1c, AIMP1, and a reporter plasmid, viz. the SREBP1c-response element-luciferase (SRE-Luc). After transfection, cells were harvested for the luciferase assays. Luciferase activity was normalized to  $\beta$ -gal activity. **B.** HEK293 cells were transfected with the indicated plasmids, namely ERR $\gamma$ , AIMP1, and a reporter plasmid, ERR $\gamma$ -response element-luciferase (ERE-Luc). After transfection, cells were harvested for luciferase assays. Luciferase activity was normalized to  $\beta$ -gal activity. Data are presented as means and S.D. **C.** HEK293 cells were transfected with the indicated plasmids. After transfection, cells were harvested for the luciferase assays. Luciferase activity was normalized to  $\beta$ -gal activity.

**Supplementary Table. 1. Specific primers for quantitative RT-PCR**

**A**

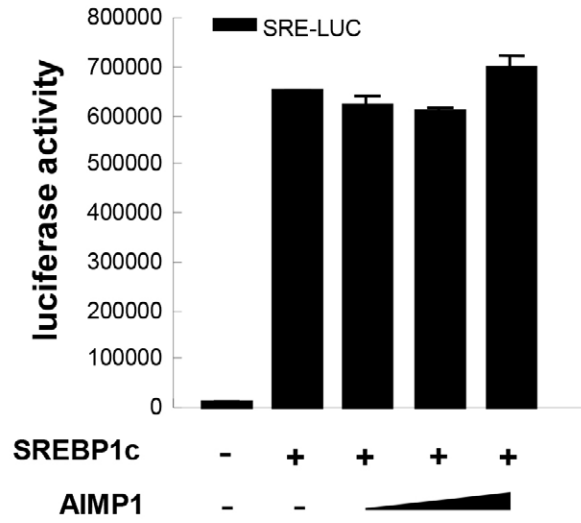

**B**

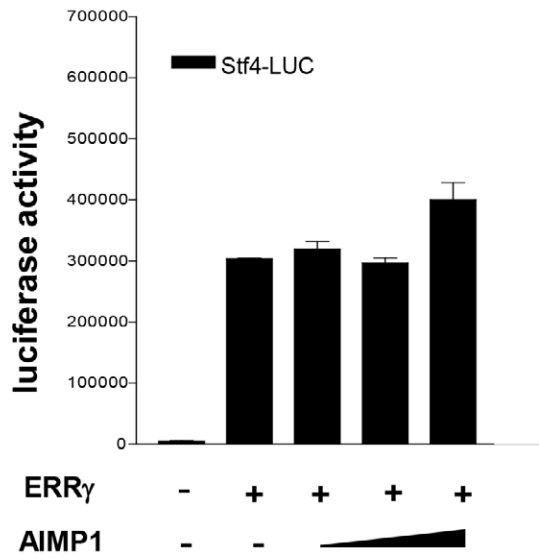

**C**

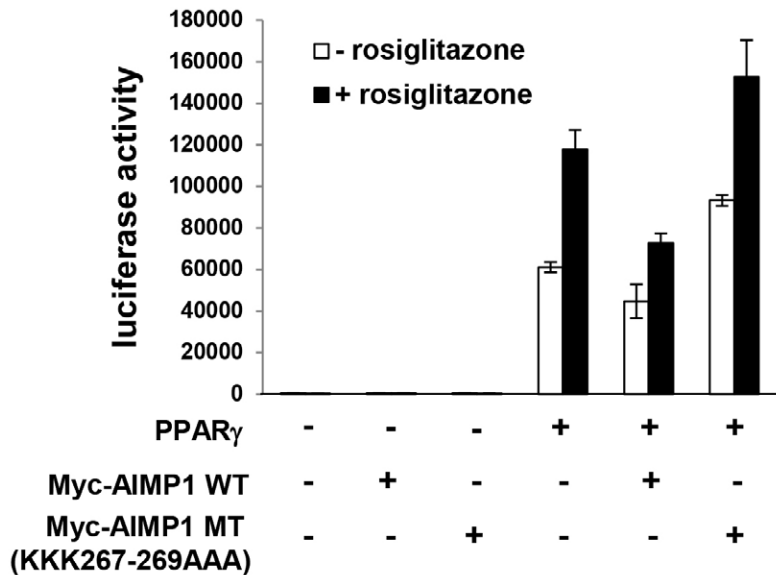

## Supplemental Table 1. Primer sets used in quantitative RT-PCR analysis

| No. | Gene Symbol | Gene name                                                                         | Gene Accession # | Forward (5'-->3')       | Reverse (5'-->3')           | size (bp) | Annealing temp (°C) |
|-----|-------------|-----------------------------------------------------------------------------------|------------------|-------------------------|-----------------------------|-----------|---------------------|
| 1   | AIMP1       | aminoacyl tRNA synthetase complex-interacting multifunctional protein 1           | NM_007926.2      | TTTCTCTGCCGATTCTGGGGA   | CCTGCTGCTTGAGATATTCGAT      | 109       | 55                  |
| 2   | AIMP2       | aminoacyl tRNA synthetase complex-interacting multifunctional protein 2 isoform 1 | NM_001172146.1   | CGT GCA GGA AAC ATC CGA | GTT ACG TCC AAG TCT GCA TCT | 153       | 55                  |
| 3   | AIMP3       | aminoacyl tRNA synthetase complex-interacting multifunctional protein 3           | NM_025380.2      | GACTGAAGCCGGGGAATAAGT   | TAGACTCGGGCCATTGTTGT        | 80        | 55                  |
| 4   | EPRS        | glutamyl-prolyl-tRNA synthetase                                                   | NM_029735.1      | TGCGCTACCTGGCTAGAATTG   | GCCTATCACACGAAGACAACCTT     | 120       | 55                  |
| 5   | LRS         | leucyl-tRNA synthetase                                                            | NM_134137.2      | CATTTGGGACACACGTTTTCC   | GCATACCAGTACAGTCAACC        | 109       | 55                  |
| 6   | IRS         | isoleucine-tRNA synthetase                                                        | NM_172015.3      | CCTCCCTTTGCTACTGGACTG   | TCTTCTGTCAACGTGAAACCC       | 108       | 55                  |
| 7   | MRS         | methionyl tRNA synthetase                                                         | NM_001171582.1   | TACCATTCTTACCAGGCCTA    | GCAGATTGCACTAGCAGAGAA       | 80        | 55                  |
| 8   | DRS         | aspartate--tRNA ligase, cytoplasmic isoform 1                                     | NM_177445.5      | CAGCAGTTAATGTCCAGGCT    | GCCGAATGGCATCATCCAG         | 238       | 60                  |
| 9   | RRS         | arginyl-tRNA synthetase                                                           | NM_025936.3      | GACAAAGTTGAAATTGCGGGTC  | GAGACTGGTTAGCTGTTCTGAC      | 81        | 55                  |
| 10  | VRS         | valyl-tRNA synthetase                                                             | NM_011690.3      | GGCCAGGTCTGTCACTCAAC    | TTTCTCCGTTTCTTTGCCTC        | 94        | 60                  |
| 11  | WRS         | tryptophanyl-tRNA synthetase                                                      | NM_011710.3      | CTTCAACCAAGTAAAAGGCA    | GATCTTCGGAAAAGAGTTGC        | 112       | 55                  |
| 12  | HRS         | histidyl-tRNA synthetase                                                          | NM_008214.4      | GAGGAGCTGGTACGACTCCA    | GGCGTTTAAAACAGCGGATG        | 238       | 60                  |
| 13  | Sirt1       | sirtuin 1                                                                         | NM_019812.2      | CAGCATCTTGCTGATTTGT     | GCACCGAGGAACACTGAT          | 83        | 55                  |
| 14  | PPARgamma1  | peroxisome proliferator-activated receptor gamma isoform 1                        | NM_001127330.1   | GGAAGACCACTCGCATTCTT    | GTAATCAGCAACCATTGGGTCA      | 121       | 55                  |
| 15  | PPARgamma2  | peroxisome proliferator-activated receptor gamma isoform 2                        | NM_011146.3      | TCGCTGATGCACTGCCTATG    | GAGAGGTCCACAGAGCTGATT       | 103       | 55                  |
| 16  | aP2         | fatty acid binding protein 4, adipocyte                                           | NM_024406.2      | AAGGTGAAGAGCATCATAACCCT | TCACGCCTTTCATAACACATTCC     | 133       | 55                  |
| 17  | LPL         | lipoprotein lipase                                                                | NM_008509.2      | GGGAGTTTGGCTCCAGATTT    | TGTGTCTTCAGGGTCTTAG         | 115       | 55                  |
| 18  | C/EBPalpha  | CCAAT/enhancer binding protein (C/EBP), alpha                                     | NM_007678.3      | CAAGAACAGCAACGAGTACCG   | GTCCTGGTCAACTCCAGCAC        | 124       | 55                  |
| 19  | GAPDH       | glyceraldehyde-3-phosphate dehydrogenase                                          | NM_008084.2      | AGTGCGGTGTGAACGGATTTG   | GGGGTCTGTGATGGCAACA         | 95        | 55                  |
